# Supplementary material
Source: PubMed Central journal article supplement (PMC2890810)
Supplement: 0914302107_pnas.0914302107_SI.pdf [file 0914302107_pnas.0914302107_SI.pdf]

# Supporting Information

Li et al. 10.1073/pnas.0914302107

## SI Text

**Noise Clustering Based on Mixture Gaussian.** To group together genes with similar expression noise level, we used a generative model to learn the inherent noise structure. Briefly, at step (1), we modeled the noise distribution with Gaussian mixtures, whose parameters were automatically learned by the expectation-maximization algorithm. At step (2), the number of Gaussian components,  $K$ , was determined by minimizing Bayesian information criterion (or Schwarz criterion, BIC) in our model selection. By varying  $K = 1$  to 10, we found BIC reaches the minimal when  $K = 7$ . At step (3), to unambiguously assign each gene into one of the seven noise clusters, we took a Bayesian approach to calculate the posterior probability for each gene to belong to each of the seven noise clusters; we then assigned the gene to the cluster with the highest posterior probability. We noted that this algorithm is purely based on the intrinsic noise structure and also guarantees that genes with similar expression noise are grouped together.

**Calculating Clustering Coefficient  $C$ .** The local clustering coefficient of a vertex in a network reflects the possibility of the vertex within a clique formed by its immediate interacting partners. For the  $i$ th node with  $K_i$  immediate neighbors in an undirected network, its clustering coefficient  $C_i$  is defined as the following (1):  $C_i = \frac{2|e_{jk}|}{K_i(K_i-1)}$ , where  $|e_{jk}|$  represents the total number of edges between its  $K_i$  neighbors.

The above clustering coefficients were defined in the undirected networks (1), such as the protein interaction networks; in the gene regulatory network which is a directed network, we followed a generalized definition proposed in ref. 2.

**Calculating Modularity Index  $Q$ .** We adopted Newman's approach to calculate network modularity  $Q$  (3). Given an undirected network defined by the adjacency matrix  $A$ , where  $A_{ij} = 1$  if node  $i$  and  $j$  have an edge while  $A_{ij} = 0$  if node  $i$  has no connection with node  $j$ . For any partition of the network into two modules, the modularity index  $Q$  of the partition can be defined as

$$Q = Q = \frac{1}{4m} s^T B s, \quad \text{where } B_{ij} = A_{ij} - \frac{k_i k_j}{2m}.$$

1. Watts DJ, Strogatz SH (1998) Collective dynamics of 'small-world' networks. *Nature* 393(6684):440–442.
2. Fagiolo G (2007) Clustering in complex directed networks. *Phys Rev E* 76(2 Pt 2):026107.

In the above equation,  $S$  is a vector whose element  $s_i = 1$  indicates the node  $i$  belongs to module 1 while  $s_i = -1$  for the node  $i$  classified into module 2.  $k_i, k_j, \dots$  is the network degree of node  $i$  and  $j$ ;  $m = \frac{\sum_{ij} A_{ij}}{2}$ . In our analysis clustering coefficients in protein interaction networks and the gene regulatory network were calculated using GAIMC toolbox implemented in MATLAB, and betweenness in protein interaction networks were calculated based on the Graph module in Perl.

**Automated Image Acquisition.** Yeast cells expressing GFP fusion chimeras were grown in YEPD media overnight in 96-well format deep-well blocks and subcultured for 5 hours in prewarmed fresh media to obtain cells in log phase. Cells were then resuspended in low fluorescent media and distributed in 96-well glass bottomed plates (MMI Greiner M plates). An ImageXpress 5000A fluorescence microscopy system from Molecular Devices was used to acquire images. Images were acquired at room temperature for two hours.

**Automated image quantification.** Automated image acquisition and analysis were performed with MetaXpress software, v1.63 (Molecular Devices). After images were shade-corrected and background-subtracted, objects were segmented and single cells were defined using background cell fluorescence in the GFP channel. We used a series of MetaXpress modules to segment whole cells. Once cells were identified, dead cells were removed from further analysis by gating average-grayscale as they had high autofluorescence. A minimal set of features (dimension, shape factor, and elliptical form factor) was used to train the software to efficiently classify an unseen image into two categories such as budded and unbudded cells. Each budded or unbudded cell was taken as a region of interest, and the dimension and intensity profiles of each region of interest were quantified individually for each cell.

3. Newman ME (2006) Modularity and community structure in networks. *Proc Natl Acad Sci USA* 103(23):8577–8582.
